# Supplementary material for: An anti-collusion attack defense method for physical layer key generation scheme based on transmission delay
Source: PeerJ journal article supplement (doi:10.7717/peerj-cs.1349), 2023-04-24
Supplement: Appendix_81216_JT_staff.pdf [file Appendix_81216_JT_staff.pdf]

## 1 APPENDIX

### 2 Appendix A. Proof of monotonicity of $p_{success,I}$

3 **Lemma 1.** Let  $F(n) = \sum_{r=0}^n C_n^r \alpha^r (1-\alpha)^{n-r} f(r)$ ,  $0 < \alpha < 1$ , if the sequence  $f(n)$  is monotone increasing  
4 sequence, then the sequence  $F(n)$  is monotone increasing sequence.

*Proof.* Let  $w(n, r) = C_n^r \alpha^r (1-\alpha)^{n-r}$ . Then, we have

$$\begin{aligned}
 & F(n+1) - F(n) \\
 &= \sum_{r=0}^{n+1} w(n+1, r) f(r) - \sum_{r=0}^n w(n, r) f(r) \\
 &= \sum_{r=0}^{n+1} w(n+1, r) f(r) - (\alpha + 1 - \alpha) \sum_{r=0}^n w(n, r) f(r) \\
 &= (1 - \alpha)^{n+1} f(0) + \alpha^{n+1} f(n+1) + (1 - \alpha) \sum_{r=1}^n w(n, r) f(r) \\
 &\quad + \alpha \sum_{r=1}^n w(n, r-1) f(r) - (\alpha + 1 - \alpha) \sum_{r=0}^n w(n, r) f(r) \\
 &= (1 - \alpha)^{n+1} f(0) + \alpha^{n+1} f(n+1) - (1 - \alpha)^{n+1} f(0) \\
 &\quad + \alpha \sum_{r=0}^{n-1} w(n, r) f(r+1) - \alpha \sum_{r=0}^n w(n, r) f(r) \\
 &= \alpha^{n+1} f(n+1) + \alpha \sum_{r=0}^{n-1} w(n, r) [f(r+1) - f(r)] - \alpha^{n+1} f(n) \\
 &= \alpha \sum_{r=0}^n w(n, r) [f(r+1) - f(r)] > 0
 \end{aligned} \tag{1}$$

5 Since  $[1 - (1 - \frac{r}{m})^N]^k$  is monotonically increasing with respect to  $r$ , according to Lemma. 1, we have  
6  $p_{success,I}(n+1) > p_{success,I}(n)$ .  $\square$

### 7 Appendix B. Evidence of $p_{expose}(\alpha n) \approx p_{success,I}(n)$

8 Let  $w(n, r) = C_n^r \alpha^r (1-\alpha)^{n-r}$ ,  $0 < \alpha < 1$ , then,  $w(n, r)$  has the following properties:

- 9 • **Property 1**  $\exists r_{otp}, w(r_{otp}) = \max_r w(n, r)$ , and  $r_{otp} = [\alpha(n+1)]$ , where  $[x]$  represents the rounding  
10 down of  $x$ .

*Proof.* Consider the following inequality:

$$\begin{aligned}
 & w(n, r+1) - w(n, r) \\
 &= C_n^{r+1} \alpha^{r+1} (1-\alpha)^{n-r-1} - C_n^r \alpha^r (1-\alpha)^{n-r} \\
 &= [(\frac{n-r}{r+1})(\frac{\alpha}{1-\alpha}) - 1] w(n, r) \geq 0
 \end{aligned} \tag{2}$$

Since  $w(n, r) > 0$ , Ineq. (2) is equivalent to

$$(\frac{n-r}{r+1})(\frac{\alpha}{1-\alpha}) \geq 1 \tag{3}$$

11  $\square$

12 The solution of Ineq. (3) is  $r+1 \leq \alpha(n+1)$ . So  $r_{otp} = [\alpha(n+1)]$ .

- 13 • **Property 2** Let  $w(n, r_{otp} + \Delta r) = w(n, r_{otp}) \beta(\Delta r)$ , then  $0 < \beta(\Delta r) \leq 1$  and  $\beta(\Delta r)$  decreases as  $|\Delta r|$   
14 increases.

*Proof.* Since  $w(n, r) > 0$  and we have

$$\beta(\Delta r) = \frac{w(n, r_{otp} + \Delta r)}{w(n, r_{otp})} \leq \frac{w(n, r_{otp})}{w(n, r_{otp})} = 1 \quad (4)$$

so  $0 < \beta(\Delta r) \leq 1$ .

Besides, when  $\Delta r > 0$ , we have

$$\begin{aligned} \frac{\beta(\Delta r + 1)}{\beta(\Delta r)} &= \frac{w(n, r_{otp} + \Delta r + 1)}{w(n, r_{otp} + \Delta r)} \\ &< \frac{w(n, r_{otp} + \Delta r)}{w(n, r_{otp} + \Delta r)} = 1 \end{aligned} \quad (5)$$

Similarly, when  $\Delta r < 0$ ,  $\frac{\beta(\Delta r + 1)}{\beta(\Delta r)} < 1$  is also true.  $\square$

Let  $W(\alpha) = [w(n, 0), w(n, 1), \dots, w(n, n)]$ , then the distribution characteristics of  $W(\alpha)$  is shown in Fig. A1.

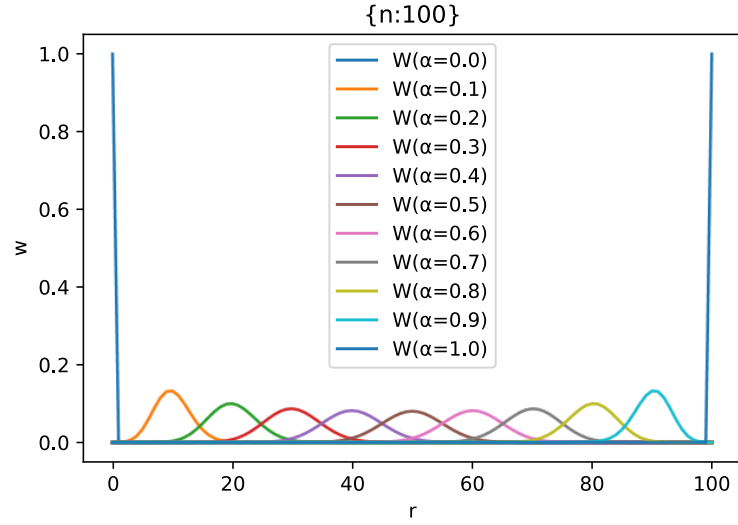

**Figure A1.** The distribution characteristics of  $W(\alpha)$

It's clear from Fig. A1 that  $r_{otp}$  increases linearly as  $\alpha$  increase, and  $F(n)$  can be approximated by few  $w(n, r)f(r)$  terms, that is

$$\begin{aligned} F(n) &= \sum_{r=0}^n w(n, r)f(r) \\ &\approx w(n, r_{otp})f(r_{otp}) + \sum_{i=0}^{\Delta r} w(n, r_{otp})\beta(\pm i)f(r_{otp} \pm i) \\ &\approx w(n, r_{otp})[1 + \sum_{i=0}^{\Delta r} \beta(\pm i)]f(r_{otp}) \\ &= \sum_{r=0}^n w(n, r)f(r_{otp}) = f(r_{otp}) = f(\alpha(n+1)) \end{aligned} \quad (6)$$

Therefore, we have

$$\begin{aligned} p_{success\_I}(n) &= \sum_{r=0}^n w(n, r)p_{expose}(r) \\ &\approx p_{expose}(\alpha(n+1)) \approx p_{expose}(\alpha n) \end{aligned} \quad (7)$$

### 21 Appendix C. An appropriate value of $\mu$

22 By calculating all possible values of  $p_{success-II}$  under all possible  $n$ , the value of  $n_{II\_otp}$  under the experiment  
 23 can be selected as the experimental result. The experimental result is discrete, so the curve will be stepped.  
 24 Then, the approximate results are calculated by Eq. (8), and by comparing them with each other we can  
 25 get the value of  $\mu$ .

$$n_{II\_otp} \approx \left\langle \frac{mk}{k(N-1) - m \ln \alpha} \right\rangle, \alpha \leq \mu \quad (8)$$

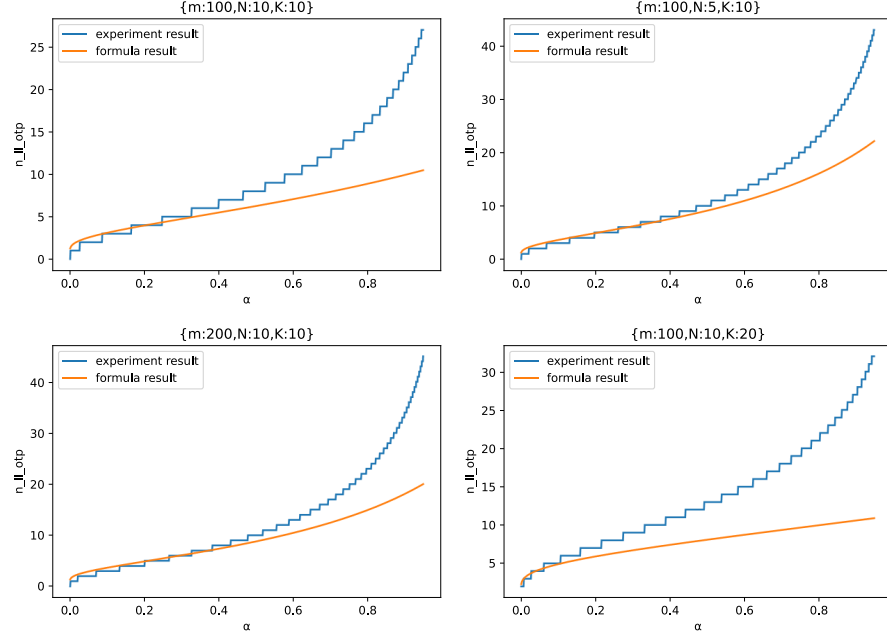

**Figure A2.** Comparison between approximate solution of  $n_{II\_otp}$  and experimental solution

26 It can be seen from Fig. A2 that  $\mu$  is not static but increases with the decrease of  $N$  and the increase of  
 27  $m$ , and it decreases as  $k$  increases. However, it is not significant to analyze the relationship between  $\mu$  and  
 28  $m, N, k$ , so the available value of  $\mu$  we choose is 0.2 according to the experimental results. Usually, in the  
 29 scenario of “Cautious Defender”,  $\alpha \leq 0.2$  can be satisfied, and then the attacker can calculate the best  
 30 attack strategy more quickly with approximate formula.
